# Supplementary material
Source: Springer Nature journal article supplement (https://www.springermedizin.de/resource/supplementary/13256_2011_1782_MOESM5_ESM.pdf/9648442)

Placenta  
accreta

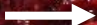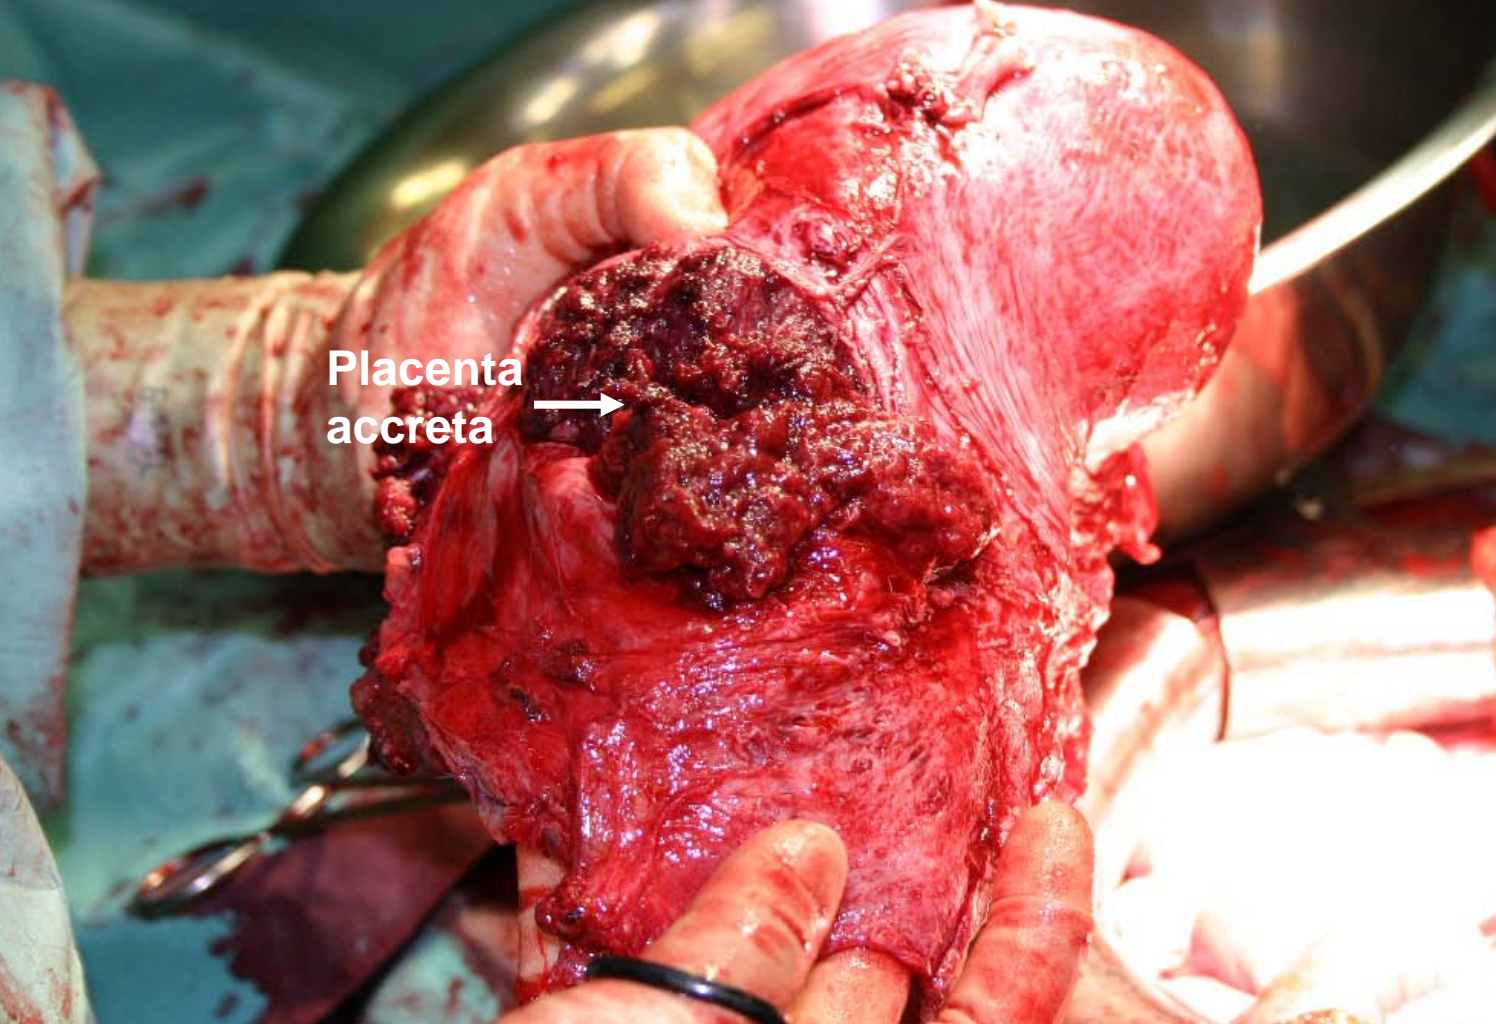

Supplement: MOESM5 [file 9648442]
